# Supplementary material for: Controllable MnCo2S4 nanostructures for high performance hybrid supercapacitors
Source: Royal Society of Chemistry journal article supplement (doi:10.1039/c7ta00943g), 2017-01-01
Supplement: c7ta00943g1.pdf [file c7ta00943g1.pdf]

**Supporting Information**

**Controllable MnCo<sub>2</sub>S<sub>4</sub> Nanostructure for high performance hybrid  
supercapacitor**

**Abdelnaby M. Elshahawy, Li Xin, Zhang Hong, Yating Hu, Kuan Hung Ho,  
Cao Guan, and John Wang\***

*Department of Materials Science and Engineering, National University of Singapore,  
9 Engineering Drive 1, Singapore 117575, Singapore*

\*Corresponding Author: [msewangj@nus.edu.sg](mailto:msewangj@nus.edu.sg), [msegc@nus.edu.sg](mailto:msegc@nus.edu.sg)

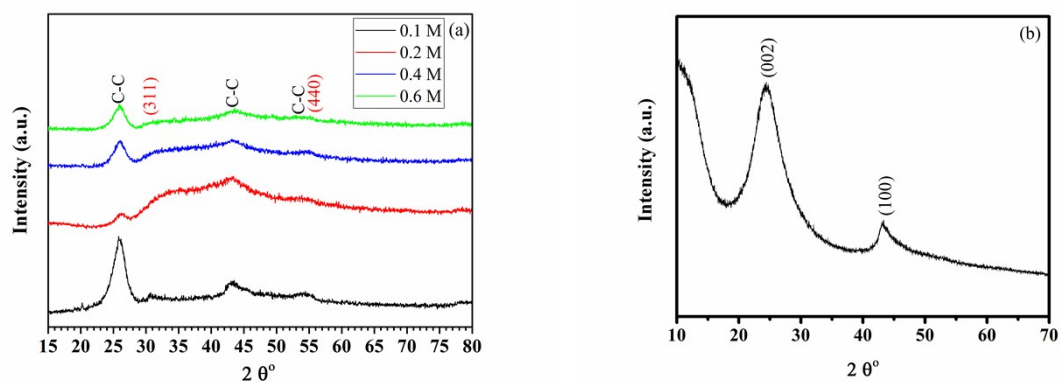

Figure S1: XRD of: (a) MnCo<sub>2</sub>S<sub>4</sub> /CC derived from different Sulphur concentrations, (b) PCP/rGO hydrogel.

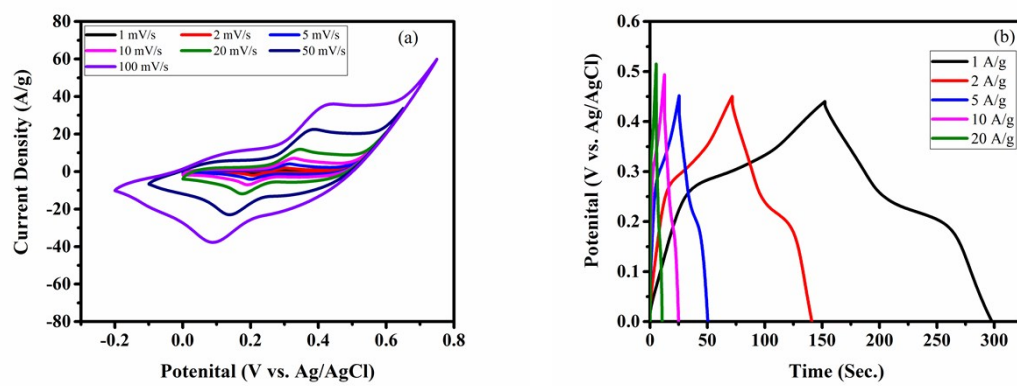

Figure S2: Electrochemical performance of MnCo<sub>2</sub>S<sub>4</sub>/CC derived from 0.1M Na<sub>2</sub>S.9H<sub>2</sub>O. (a) CV curves at different scanning rates. (b) Charge-discharge curves under different current densities.

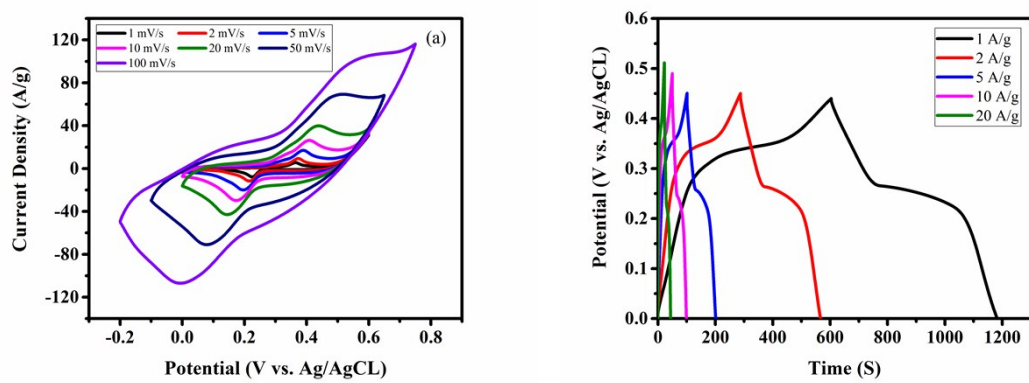

Figure S3: Electrochemical performance of MnCo<sub>2</sub>S<sub>4</sub>/CC derived from 0.4M Na<sub>2</sub>S·9H<sub>2</sub>O. (a) CV curves at different scanning rates. (b) Charge-discharge curves under different current densities.

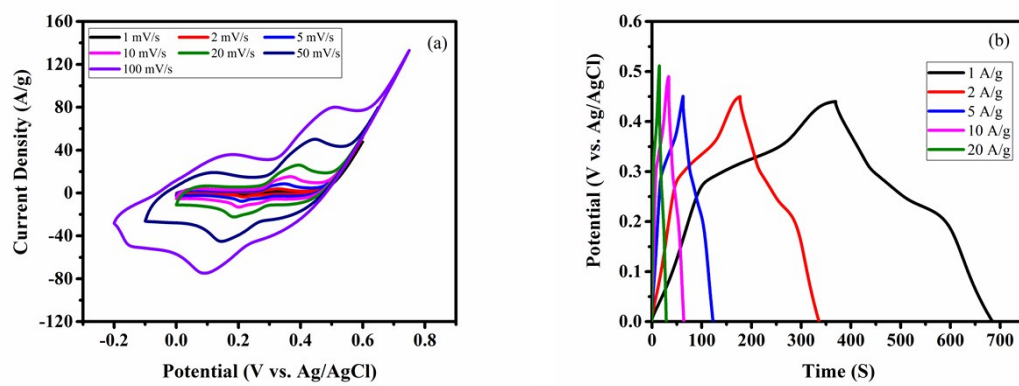

Figure S4: Electrochemical performance of MnCo<sub>2</sub>S<sub>4</sub>/CC derived from 0.6M Na<sub>2</sub>S.9H<sub>2</sub>O. (a) CV curves at different scanning rates. (b) Charge-discharge under different current densities.

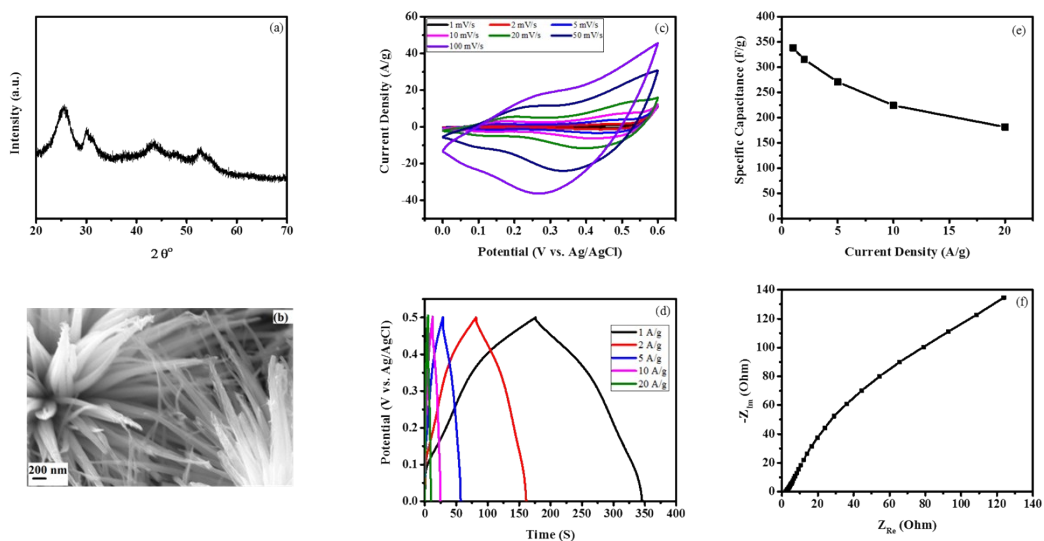

Figure S5: (a) XRD, (b) SEM Image, (c) CV curves at different scanning rates, (d) Charge–discharge under different current densities, (e) Specific capacitance as a function of current density and (f) Nyquist plots of CoS<sub>x</sub>/CC electrodes.

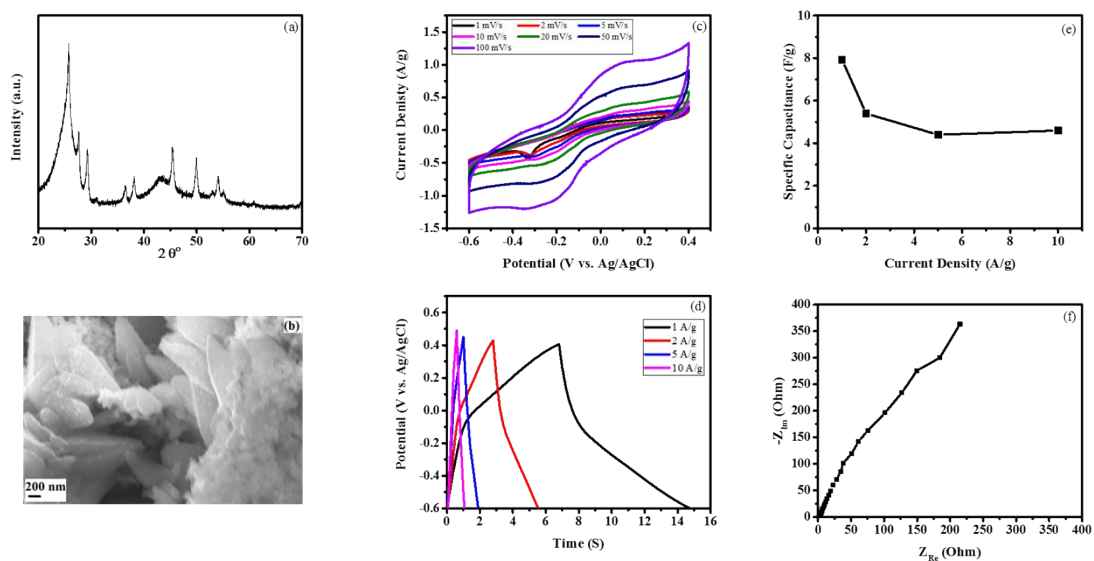

Figure S6: (a) XRD, (b) SEM Image, (c) CV curves at different scanning rates, (d) Charge–discharge under different current densities, (e) Specific capacitance as a function of current density and (f) Nyquist plots of MnS<sub>x</sub>/CC electrodes.

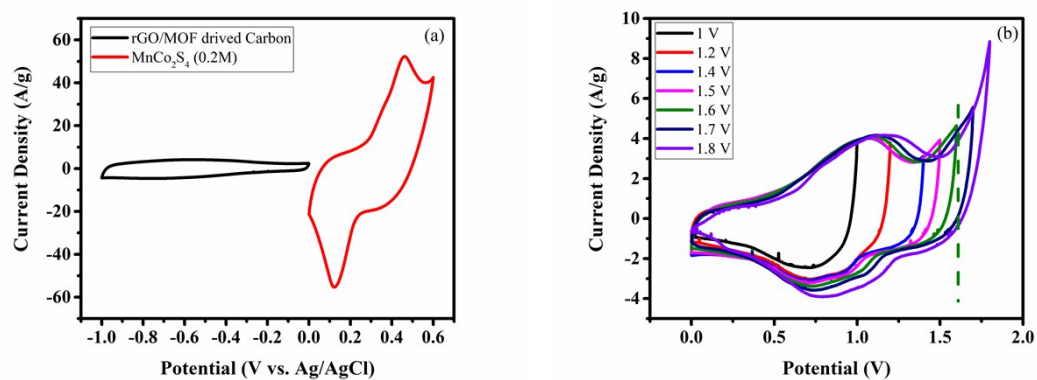

Figure S7. (a) Cyclic voltammetry profiles of MnCo<sub>2</sub>S<sub>4</sub>/CC as the positive electrode and PCP/rGO as the negative electrode at the same scan rate of 20 mV/s. (b) CV curves of MnCo<sub>2</sub>S<sub>4</sub>/CC//PCP/rGO supercapacitor full cell collected in different cell voltages at the scan rate of 20 mV/s in 2M KOH electrolyte.
